# Supplementary material for: Maternal, placental and cordonal metallomic profiles in gestational diabetes mellitus
Source: Royal Society of Chemistry journal article supplement (doi:10.1039/c8mt00331a), 2019-02-22
Supplement: c8mt00331a1.pdf [file c8mt00331a1.pdf]

## SUPPORTING INFORMATION

### **MATERNAL, PLACENTAL AND CORDONAL METALLOMIC PROFILE IN GESTATIONAL DIABETES MELLITUS**

Marco Roverso,<sup>a</sup> Valerio Di Marco,<sup>\*a</sup> Denis Badocco,<sup>a</sup> Paolo Pastore,<sup>a</sup> Marilia Calanducci<sup>b</sup>, Erich Cosmi<sup>b</sup> and Silvia Visentin<sup>b</sup>

<sup>a</sup> Department of Chemical Sciences, University of Padova, via Marzolo 1, 35131 Padova, Italy. E-mail: [valerio.dimarco@unipd.it](mailto:valerio.dimarco@unipd.it); Tel: +39 0498275219

<sup>b</sup> Department of Woman's and Child's Health, University of Padova, via Giustiniani 2, 35128 Padova, Italy

Table S1. Literature survey of comparative metallomics results in GDM published from 2014 till 2018. This table is the prosecution of Table 1 of this reference: M. Roverso, C. Berté, V. Di Marco, A. Lapolla, D. Badocco, P. Pastore, S. Visentin and E. Cosmi, *Metallomics*, 2015, 7, 1146-1154. Where no element was indicated, no statistically significant correlation was found. If not specified, mother samples were considered.

| Biological substrate | Ref. | Elements with higher GDM levels | Elements with lower GDM level |
|----------------------|------|---------------------------------|-------------------------------|
| cord serum           | 5    |                                 | Ca, Zn                        |
| blood                | 5    |                                 |                               |
| serum                | 8    |                                 | Mg                            |
| plasma               | 6    |                                 |                               |
| plasma               | 3    |                                 | Mg                            |
| blood                | 2    |                                 | Mg                            |
| serum                | 11   | As                              |                               |
| serum                | 12   |                                 |                               |
| cord serum           | 1    |                                 | Ca                            |
| newborn meconium     | 4    | As, Cd, Cr, Hg                  |                               |
| serum                | 13   | Cu                              | Fe                            |
| urine                | 14   | Cd                              |                               |
| urine                | 15   | Cd                              |                               |
| urine                | 9    |                                 |                               |
| hairs                | 10   | Hg                              |                               |
| cord blood           | 10   |                                 |                               |
| urine                | 7    |                                 |                               |

Table S2: details about the characteristic of the women recruited for the study.

| Order number of the patients | Samples                           |                                     | Main characteristics            |                        |                                                 |     |                          |                    | Diet frequency (number of times eaten per week) |                              |           |      |      |      |         |                 |        |            |       | Diet supplm.<br>(1 = yes) |                                               |
|------------------------------|-----------------------------------|-------------------------------------|---------------------------------|------------------------|-------------------------------------------------|-----|--------------------------|--------------------|-------------------------------------------------|------------------------------|-----------|------|------|------|---------|-----------------|--------|------------|-------|---------------------------|-----------------------------------------------|
|                              | cord blood available<br>(y = yes) | mother blood available<br>(y = yes) | Placenta available<br>(y = yes) | GDM (1) or control (0) | ethnicity (C = Caucasian,<br>N = non-caucasian) | age | BMI (kg/m <sup>2</sup> ) | newborn weight (g) | pasta/rice                                      | bread, breadsticks, crackers | oven food | meat | fish | eggs | legumes | milk or yogurth | cheese | vegetables | fruit | general diet supplements  | multivitaminic and mineral<br>diet supplement |
| 1                            | y                                 | y                                   | y                               | 1                      | C                                               | 30  | 18.69                    | 3430               | 7                                               | 7                            | 7         | 3    | 2    | 1    | 1       | 7               | 3      | 14         | 7     | 1                         | 1                                             |
| 2                            |                                   |                                     | y                               | 1                      | C                                               | 34  | 20.9                     | 2750               | 14                                              | 14                           | 0         | 1    | 1    | 0    | 0       | 1               | 2      | 21         | 7     | 1                         |                                               |
| 3                            | y                                 | y                                   | y                               | 1                      | N                                               | 26  | 22.38                    | 3195               | 21                                              | 7                            | 7         | 0    | 1    | 0    | 2       | 7               | 2      | 28         | 7     |                           |                                               |
| 4                            | y                                 | y                                   | y                               | 1                      | N                                               | 29  | 27.78                    | 2480               | 28                                              | 7                            | 7         | 3    | 0    | 1    | 0       | 7               | 0      | 7          | 0     |                           |                                               |
| 5                            | y                                 | y                                   | y                               | 1                      | C                                               | 42  | 23.05                    | 3230               | 2                                               | 3                            | 0         | 4    | 3    | 1    | 3       | 14              | 2      | 21         | 14    | 1                         |                                               |
| 6                            | y                                 | y                                   | y                               | 1                      | C                                               | 47  | 17.07                    | 3100               | 7                                               | 7                            | 0         | 1    | 1    | 0    | 0       | 21              | 1      | 7          | 7     | 1                         |                                               |
| 7                            | y                                 | y                                   | y                               | 1                      | C                                               | 43  | 16.65                    | 3180               | 2                                               | 0                            | 0         | 3    | 1    | 0    | 2       | 7               | 2      | 14         | 7     |                           |                                               |
| 8                            | y                                 | y                                   | y                               | 1                      | C                                               | 33  | 16.65                    | 2920               | 0                                               | 14                           | 0         | 1    | 2    | 1    | 2       | 7               | 2      | 21         | 14    | 1                         |                                               |
| 9                            |                                   |                                     | y                               | 1                      | C                                               | 37  | 20.42                    | 3290               | 2                                               | 14                           | 0         | 1    | 3    | 1    | 0       | 7               | 2      | 14         | 7     | 1                         |                                               |
| 10                           | y                                 | y                                   | y                               | 1                      | C                                               | 30  | 19.37                    | 3400               | 3                                               | 0                            | 0         | 2    | 2    | 0    | 1       | 1               | 2      | 14         | 14    |                           |                                               |
| 11                           | y                                 | y                                   | y                               | 1                      | C                                               | 23  | 20.96                    | 2940               | 7                                               | 7                            | 0         | 2    | 1    | 0    | 0       | 1               | 2      | 21         | 7     |                           |                                               |
| 12                           | y                                 | y                                   | y                               | 1                      | C                                               | 35  | 17.72                    | 3770               | 14                                              | 14                           | 7         | 0    | 3    | 1    | 2       | 7               | 7      | 14         | 14    | 1                         |                                               |
| 13                           | y                                 | y                                   | y                               | 1                      | C                                               | 27  | 21.2                     | 3150               | 0                                               | 0                            | 7         | 3    | 3    | 14   | 0       | 0               | 0      | 21         | 0     |                           |                                               |
| 14                           | y                                 | y                                   | y                               | 1                      | C                                               | 30  | 18.83                    | 2830               | 7                                               | 14                           | 2         | 3    | 2    | 1    | 1       | 14              | 7      | 14         | 7     |                           |                                               |
| 15                           | y                                 | y                                   | y                               | 1                      | C                                               | 36  | 18.56                    | 3330               | 2                                               | 7                            | 2         | 2    | 2    | 2    | 5       | 7               | 7      | 14         | 7     | 1                         | 1                                             |
| 17                           | y                                 | y                                   | y                               | 1                      | N                                               | 31  | 27.55                    | 2675               | 14                                              | 7                            | 7         | 3    | 4    | 1    | 1       | 2               | 2      | 14         | 3     |                           |                                               |
| 18                           | y                                 | y                                   |                                 | 1                      | C                                               | 37  | 19                       | 3130               | 2                                               | 14                           | 0         | 2    | 3    | 1    | 2       | 7               | 2      | 21         | 14    |                           |                                               |
| 19                           | y                                 | y                                   | y                               | 1                      | C                                               | 40  | 21.8                     | 3650               | 7                                               | 0                            | 1         | 2    | 2    | 1    | 1       | 7               | 2      | 5          | 7     | 1                         | 1                                             |
| 20                           | y                                 | y                                   | y                               | 1                      | C                                               | 42  | 19.26                    | 3680               | 4                                               | 7                            | 2         | 2    | 1    | 1    | 7       | 0               | 2      | 7          | 7     | 1                         | 1                                             |
| 21                           | y                                 | y                                   | y                               | 1                      | C                                               | 25  | 28.72                    | 2690               | 2                                               | 2                            | 0.75      | 7    | 1    | 1    | 7       | 3               | 1      | 14         | 21    |                           |                                               |

|    |   |   |   |   |   |    |       |      |    |      |   |   |      |      |      |    |      |    |     |   |   |
|----|---|---|---|---|---|----|-------|------|----|------|---|---|------|------|------|----|------|----|-----|---|---|
| 22 | y | y | y | 1 | N | 30 | 28.95 | 3690 | 7  | 2    | 0 | 7 | 7    | 1    | 0    | 3  | 2    | 1  | 7   |   |   |
| 23 | y | y | y | 1 | N | 22 | 23.05 | 3515 | 2  | 7    | 7 | 7 | 3    | 2    | 1    | 14 | 14   | 7  | 1   |   |   |
| 24 | y | y | y | 1 | C | 32 | 26.33 | 2800 | 6  | 7    | 2 | 4 | 2    | 2    | 2    | 7  | 5    | 14 | 5   | 1 | 1 |
| 25 | y | y | y | 1 | C | 34 | 23.39 | 3730 | 7  | 1    | 7 | 2 | 2    | 1    | 2    | 7  | 2    | 14 | 7   |   |   |
| 26 | y | y | y | 1 | C | 41 | 28.09 | 4040 | 5  | 1.25 | 3 | 3 | 0.25 | 0.25 | 1    | 7  | 7    | 3  | 5   |   |   |
| 27 | y | y | y | 1 | C | 33 | 26.77 | 3980 | 7  | 7    | 1 | 2 | 1    | 0    | 2    | 7  | 14   | 7  | 0.5 | 1 |   |
| 28 | y | y | y | 1 | C | 36 | 20.9  | 3945 | 7  | 7    | 7 | 7 | 1    | 1    | 1    | 7  | 3    | 7  | 7   |   |   |
| 29 | y | y | y | 1 | N | 31 | 26.71 | 4150 | 14 | 2    | 7 | 7 | 2    | 1    | 0.5  | 4  | 3    | 5  | 4   | 1 | 1 |
| 30 | y | y | y | 1 | C | 35 | 23.14 | 4290 | 7  | 3    | 1 | 7 | 0.5  | 1    | 0.75 | 7  | 2    | 7  | 7   | 1 | 1 |
| 31 | y | y | y | 0 | C | 24 | 21.87 | 3365 | 7  | 21   | 0 | 3 | 1    | 1    | 2    | 3  | 14   | 14 | 7   | 1 |   |
| 32 | y | y | y | 0 | C | 32 | 32.39 | 3610 | 14 | 14   | 1 | 0 | 3    | 0    | 0    | 1  | 2    | 21 | 14  | 1 |   |
| 33 | y | y | y | 0 | C | 29 | 19.84 | 3830 | 7  | 14   | 0 | 4 | 1    | 0.75 | 0    | 3  | 2    | 3  | 3   |   |   |
| 34 | y | y | y | 0 | N | 37 | 26.77 | 3830 | 7  | 7    | 2 | 7 | 0    | 0.5  | 3    | 1  | 0.25 | 3  | 7   |   |   |
| 35 | y | y | y | 0 | C | 38 | 17.86 | 3520 | 14 | 14   | 0 | 2 | 3    | 2    | 1    | 2  | 7    | 7  | 0   |   |   |
| 36 |   |   | y | 0 | C |    | 34.81 | 3670 | 7  | 21   | 0 | 1 | 2    | 0.5  | 1    | 2  | 3    | 14 | 3   |   |   |
| 37 | y | y | y | 0 | C | 42 | 18.36 | 3100 | 14 | 14   | 0 | 3 | 2    | 0.25 | 1    | 7  | 7    | 14 | 7   | 1 |   |
| 38 | y | y | y | 0 | C | 37 | 31.89 | 3190 | 0  | 14   | 0 | 0 | 2    | 1    | 0.5  | 14 | 3    | 3  | 14  |   |   |
| 39 |   |   | y | 0 | N | 25 | 23.88 | 3465 | 7  | 14   | 0 | 2 | 1    | 0.75 | 1    | 3  | 1    | 7  | 7   |   |   |
| 40 |   |   | y | 0 | N | 32 | 25.1  | 2950 | 3  | 14   | 0 | 2 | 4    | 1    | 1.25 | 14 | 2    | 5  | 3   |   |   |
| 41 | y | y | y | 0 | N | 31 | 17.99 | 3400 | 2  | 21   | 1 | 1 | 0    | 2    | 1    | 1  | 2    | 14 | 14  |   |   |
| 42 | y | y | y | 0 | N | 25 | 19.83 | 3370 | 14 | 14   | 0 | 2 | 2    | 0    | 0.75 | 2  | 1    | 21 | 14  |   |   |
| 43 |   |   | y | 0 | N | 32 | 38.51 | 3545 | 2  | 14   | 0 | 7 | 1    | 0    | 1    | 14 | 0    | 7  | 7   |   |   |
| 44 | y | y | y | 0 | C | 38 | 23.74 | 3140 | 3  | 21   | 7 | 7 | 0    | 0.5  | 0    | 14 | 3    | 14 | 4   |   |   |
| 45 | y | y | y | 0 | N | 41 | 29.76 | 3580 | 3  | 4    | 1 | 4 | 3    | 1    | 2    | 3  | 1    | 2  | 2   |   |   |
| 46 | y | y | y | 0 | C | 35 | 25    | 3700 | 2  | 7    | 2 | 3 | 1    | 1    | 7    | 7  | 4    | 7  | 7   |   |   |
| 47 | y | y | y | 0 | N | 30 | 20.81 | 3430 | 7  | 7    | 7 | 3 | 2    | 5    | 1    | 7  | 2    | 14 | 7   |   |   |
| 48 | y | y | y | 0 | N |    | 23.88 | 3680 | 7  | 3    | 7 | 7 | 3    | 1    | 2    | 4  | 2    | 4  | 7   |   |   |
| 49 | y | y | y | 0 | N | 28 | 17.93 | 3410 | 9  | 1    | 3 | 7 | 2    | 3    | 0    | 14 | 3    | 14 | 7   | 1 |   |
| 50 | y | y | y | 0 | C | 43 | 26.62 | 3320 | 14 | 7    | 0 | 7 | 3    | 2    | 0    | 0  | 2    | 14 | 14  | 1 |   |
| 51 | y | y | y | 1 | N | 30 | 24.61 | 3230 | 14 | 7    | 0 | 1 | 0    | 0    | 2    | 0  | 0    | 21 | 7   |   |   |
| 52 | y |   | y | 1 | C | 31 | 23.8  | 3830 |    |      |   |   |      |      |      |    |      |    |     |   |   |
| 53 |   | y | y | 1 | C | 30 | 18.44 | 3000 | 7  | 4    | 4 | 5 | 1    | 1    | 0.5  | 7  | 2    | 7  | 7   | 1 | 1 |

|    |   |   |   |   |   |    |       |      |    |    |      |      |      |      |      |   |      |    |    |   |   |
|----|---|---|---|---|---|----|-------|------|----|----|------|------|------|------|------|---|------|----|----|---|---|
| 54 | y | y | y | 1 | C | 46 | 22.05 | 3360 | 7  | 7  | 3    | 4    | 1.5  | 1    | 2    | 7 | 4    | 14 | 14 | 1 |   |
| 55 | y | y | y | 1 | C | 28 | 21.5  | 3005 | 3  | 2  | 1    | 4    | 0.5  | 0    | 0    | 0 | 3    | 1  | 0  | 1 | 1 |
| 56 | y | y | y | 1 | C | 31 | 21.11 | 4215 | 2  | 14 | 2    | 2    | 0.5  | 0.25 | 0.5  | 7 | 2    | 14 | 7  |   |   |
| 57 | y | y | y | 1 | N | 36 | 29.76 | 3840 | 3  | 3  | 0.75 | 0.25 | 0.5  | 0    | 0.5  | 1 | 7    | 3  | 14 |   |   |
| 58 | y | y | y | 0 | N | 35 | 27.56 | 2710 | 3  | 14 | 0    | 3    | 2    | 0    | 0.25 | 0 | 1    | 3  | 14 |   |   |
| 59 | y | y |   | 0 | C | 38 | 22.58 | 3290 | 4  | 3  | 4    | 2    | 0    | 0    | 0.75 | 1 | 4    | 14 | 14 | 1 |   |
| 60 | y | y | y | 0 | C | 34 | 22.03 | 3190 | 3  | 7  | 1    | 3    | 1    | 5    | 1    | 5 | 7    | 7  | 7  |   |   |
| 61 | y |   | y | 0 | N | 35 |       | 3630 | 7  | 7  | 0.5  | 2    | 0.5  | 0    | 0    | 0 | 0.5  | 0  | 0  |   |   |
| 62 | y | y | y | 0 | C | 35 | 24.61 | 3115 | 7  | 7  | 0    | 3    | 3    | 1    | 1    | 7 | 3    | 14 | 14 | 1 |   |
| 63 | y | y | y | 0 | N | 26 | 21.78 | 2860 | 7  | 14 | 0    | 1    | 2    | 2    | 2    | 1 | 3    | 14 | 14 |   |   |
| 64 | y | y | y | 0 | C | 43 | 21.72 | 3520 | 7  | 14 | 0.75 | 3    | 0.5  | 0.25 | 1    | 0 | 0    | 14 | 3  |   |   |
| 65 | y | y | y | 0 | C | 35 | 30.42 | 3470 | 7  | 4  | 0.25 | 2    | 2    | 1    | 1    | 0 | 1    | 14 | 14 | 1 | 1 |
| 66 | y | y | y | 0 | N | 34 | 23.73 | 3760 | 3  | 14 | 1    | 1    | 0.25 | 0.25 | 0.5  | 7 | 1    | 14 | 14 |   |   |
| 67 | y | y | y | 0 | C | 27 | 20.2  | 3185 | 14 | 14 | 1    | 1    | 2    | 1    | 1    | 2 | 2    | 7  | 7  |   |   |
| 68 | y | y | y | 0 | N | 39 | 23.4  | 2995 | 14 | 14 | 2    | 1    | 0.5  | 1    | 7    | 1 | 1    | 7  | 2  |   |   |
| 69 | y | y | y | 1 | C |    | 23.8  | 3540 | 2  | 14 | 2    | 2    | 2    | 2    | 1    | 7 | 7    | 21 | 14 | 1 | 1 |
| 70 | y |   | y | 0 | C |    | 20.7  | 3470 | 7  | 3  | 2    | 0.75 | 1    | 0.5  | 0.5  | 7 | 7    | 14 | 14 | 1 | 1 |
| 71 | y | y | y | 0 | N | 28 | 32.27 | 3955 | 14 | 7  | 0.25 | 2    | 0.25 | 0.5  | 0.25 | 0 | 2    | 2  | 0  |   |   |
| 72 | y | y | y | 0 | N | 24 | 35.16 | 4390 | 14 | 7  | 0.25 | 2    | 0.25 | 0    | 0.25 | 7 | 0.5  | 3  | 0  |   |   |
| 73 | y | y | y | 0 | N |    | 22.27 | 3340 | 3  | 14 | 0.5  | 0.5  | 0.5  | 0    | 1    | 7 | 1    | 14 | 7  | 1 | 1 |
| 74 | y |   | y | 0 | C |    | 28.89 |      | 3  | 7  | 0.5  | 2    | 1    | 0.25 | 0.25 | 2 | 7    | 14 | 14 |   |   |
| 75 | y |   | y | 0 | C |    | 26.1  |      | 14 | 7  | 1    | 2    | 1    | 0.25 | 0.5  | 2 | 0.25 | 14 | 14 | 1 | 1 |
| 76 | y | y |   | 1 | C |    |       | 3620 | 7  | 14 | 2    | 2    | 2    | 0.5  | 1    | 0 | 2    | 14 | 14 | 1 | 1 |
| 77 | y | y |   | 0 | C | 46 |       | 2970 | 7  | 2  | 1    | 1    | 1    | 1    | 1    | 7 | 1    | 21 | 14 | 1 | 1 |

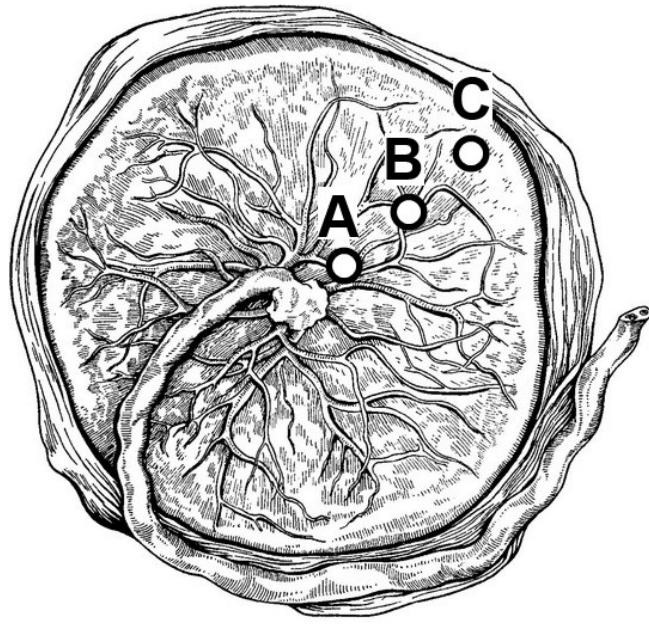

Figure S1: sampling zones (A, B, C) of the placenta.

Table S3:  $p$ -values obtained when the considered factors were related to GDM. n. = number of times eaten per week. For clarity purposes,  $p$ -values below 0.05 were evidenced in yellow background, and  $p$ -values below 0.01 were evidenced in orange background.

|                                   | Average controls | Average GDM | $\sigma_{\text{controls}}$ | $\sigma_{\text{GDM}}$ | $p$ -value1 | $p$ -value2 | $p$ -value3 |
|-----------------------------------|------------------|-------------|----------------------------|-----------------------|-------------|-------------|-------------|
| age (y)                           | 34.1             | 33.4        | 6.2                        | 6.3                   | 0.33        | 0.00        | 0.46        |
| BMI (kg/m <sup>2</sup> )          | 24.2             | 22.7        | 4.8                        | 4.1                   | 0.10        | 0.14        | –           |
| birth weight (g)                  | 3400             | 3400        | 350                        | 470                   | 0.44        | 0.36        | 0.46        |
| pasta/rice (n.)                   | 7.7              | 6.7         | 4.7                        | 6.0                   | 0.24        | 0.50        | 0.11        |
| bread, breadsticks, crackers (n.) | 10.6             | 6.3         | 5.7                        | 4.7                   | 0.00        | –           | 0.49        |
| oven food (n.)                    | 1.4              | 2.8         | 2.1                        | 2.8                   | 0.01        | 0.10        | 0.00        |
| meat (n.)                         | 2.9              | 3.1         | 2.2                        | 2.1                   | 0.31        | 0.01        | 0.00        |
| fish (n.)                         | 1.4              | 1.7         | 1.1                        | 1.3                   | 0.17        | 0.00        | 0.00        |
| eggs (n.)                         | 1.1              | 1.2         | 1.3                        | 2.3                   | 0.47        | –           | 0.01        |
| legumes (n.)                      | 1.3              | 1.6         | 1.7                        | 1.7                   | 0.27        | 0.50        | 0.00        |
| milk or yoghurt (n.)              | 4.3              | 6.0         | 4.2                        | 4.6                   | 0.06        | 0.00        | 0.00        |
| cheese (n.)                       | 2.8              | 3.6         | 2.8                        | 3.4                   | 0.15        | 0.50        | 0.00        |
| vegetables (n.)                   | 10.6             | 12.3        | 6.0                        | 6.8                   | 0.14        |             | 0.00        |
| fruit (n.)                        | 8.4              | 7.9         | 5.1                        | 5.0                   | 0.36        | 0.50        | 0.00        |
| diet supplements (n.)             | 0.3              | 0.5         | 0.5                        | 0.5                   | 0.11        | 0.50        | 0.00        |

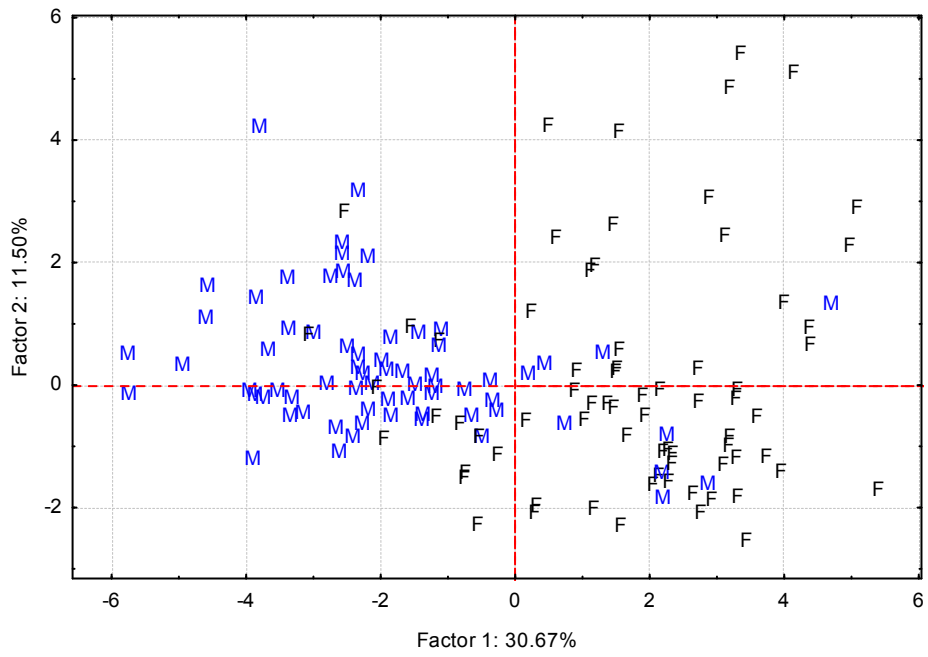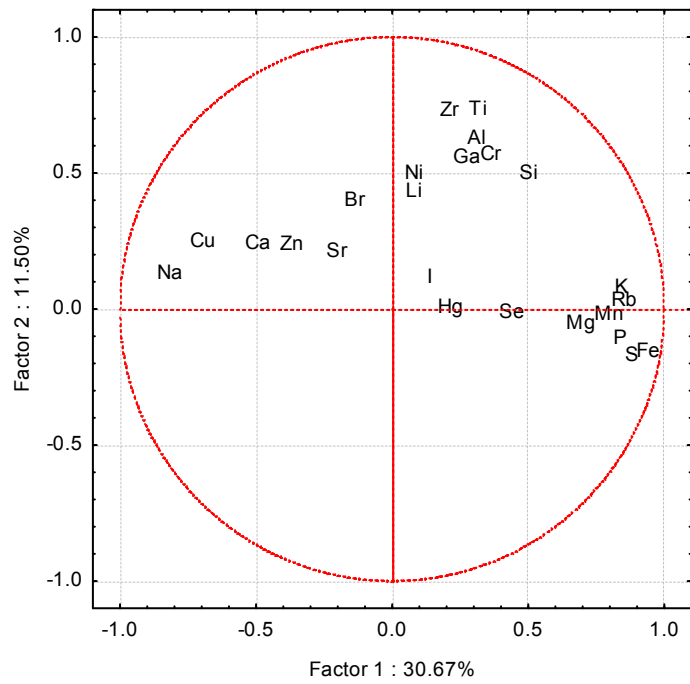

Figure S2: PCA (above: scores; below: loadings) for the whole blood elemental content in control mothers (M) and in control fetuses (F).



Table S4:  $p$ -values (pair data test) obtained when the placenta sampling zone (A, B, C) was related to the elemental content. For clarity purposes,  $p$ -values below 0.05 were evidenced in yellow background, and  $p$ -values below 0.01 were evidenced in orange background.

|    | $p$ -value |    | $p$ -value |    | $p$ -value |
|----|------------|----|------------|----|------------|
| Al | 0.98       | Hg | 0.22       | Pb | 0.34       |
| Ba | 0.15       | I  | 0.15       | Rb | 0.61       |
| Br | 0.32       | K  | 0.52       | S  | 0.20       |
| Ca | 0.15       | Li | 0.98       | Sb | 0.46       |
| Cd | 0.11       | Mg | 0.06       | Se | 0.24       |
| Co | 0.43       | Mn | 0.31       | Si | 0.93       |
| Cr | 0.52       | Mo | 0.52       | Sr | 0.22       |
| Cu | 0.46       | Na | 0.34       | Ti | 0.18       |
| Fe | 0.07       | Ni | 1.00       | Zn | 0.12       |
| Ga | 0.15       | P  | 0.05       | Zr | 0.98       |

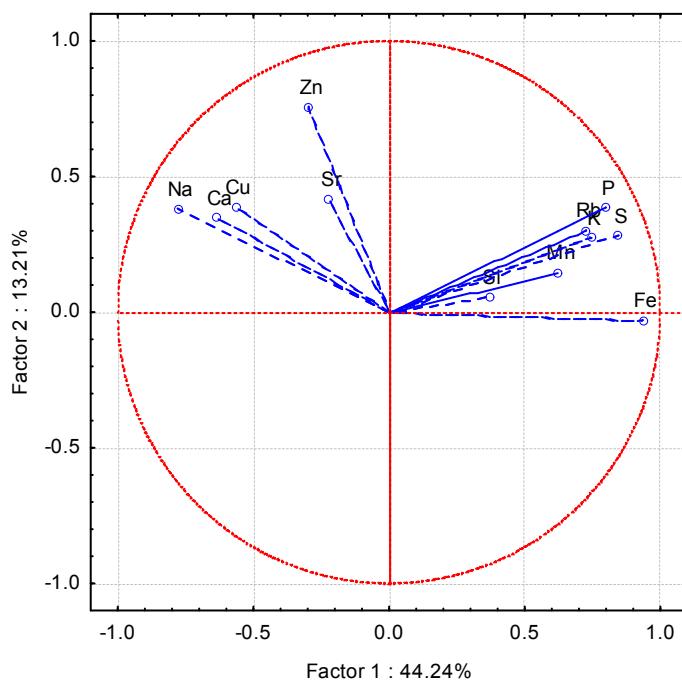

Figure S3: PCA (loadings, limited to Ca, Cu, Fe, K, Mn, Na, P, Rb, S, Si, and Zn) for the whole blood elemental content in fetuses from GDM mothers and from controls.

## References for the supporting information

- [1] Papadopoulou, A; Gole, E; Moutafi, A; Sfikas, C; Oehrl, W; Samiotaki, M; Papadimitriou, A; Papaevagelou, V; Nicolaidou, P. Calcium sensing receptor in pregnancies complicated by gestational diabetes mellitus. *PLACENTA* 2014, 35, 632-638
- [2] Tasdemir, UG; Tasdemir, N; Kilic, S; Abali, R; Celik, C; Gulerman, HC. Alterations of Ionized and Total Magnesium Levels in Pregnant Women with Gestational Diabetes Mellitus. *GYNECOLOGIC AND OBSTETRIC INVESTIGATION*, 2015, 79, 19-24
- [3] Mostafavi, E; Nargesi, AA; Asbagh, FA; Ghazizadeh, Z; Heidari, B; Mirmiranpoor, H; Esteghamati, A; Vigneron, C; Nakhjavani, M. Abdominal obesity and gestational diabetes: the interactive role of magnesium. *MAGNESIUM RESEARCH* 2015, 28, 116-124
- [4] Peng, SY; Liu, LP; Zhang, XQ; Heinrich, J; Zhang, J; Schramm, KW; Huang, QY; Tian, MP; Eqani, SAMAS; Shen, HQ. A nested case-control study indicating heavy metal residues in meconium associate with maternal gestational diabetes mellitus risk. *ENVIRONMENTAL HEALTH*, 2015, 14, article number 19
- [5] Keshvari-Delavar, Mohammad, Mozaffari-Khosravi, Hassan, Nadjarzadeh e Azadeh, Comparison of Growth Parameters, Apgar Scores, the Blood Zinc, Magnesium, Calcium and Phosphorus between Gestational Diabetic and Non-diabetic Pregnant Women, *International Journal of Pediatrics-Mashhad*, vol. 4, n. 5, pp. 1767-1775, 2016.
- [6] Nabouli, MR; Lassoued, L; Bakri, Z; Moghannem, M. Modification of Total Magnesium level in pregnant Saudi Women developing gestational diabetes mellitus. *DIABETES & METABOLIC SYNDROME-CLINICAL RESEARCH & REVIEWS*, 2016, 10, 183-185
- [7] Farzan, SF; Gossai, A; Chen, Y; Chasan-Taber, L; Baker, E; Karagas, M. Maternal arsenic exposure and gestational diabetes and glucose intolerance in the New Hampshire birth cohort study. *ENVIRONMENTAL HEALTH* 2016, 15, Article Number: 106
- [8] Schaas, BA; Ivan, S; Titianu, M; Condratovici, CP; Maier, A; Schaas, CM , Biochemical Markers Predicting the Risk of Gestational Diabetes Mellitus, *MATERIALE PLASTICE*, 2017, 54, 133-136
- [9] Romano, ME; Enquobahrie, DA; Simpson, CD; Checkoway, H; Williams, MA. A Case-Cohort Study of Cadmium Body Burden and Gestational Diabetes Mellitus in American Women (Retraction of Vol 123, Pg 993, 2015). *ENVIRONMENTAL HEALTH PERSPECTIVES*, 2017, 125, A64-A64
- [10] Valvi, D; Oulhote, Y; Weihe, P; Dalgord, C; Bjerve, KS; Steuerwald, U; Grandjean, P. Gestational diabetes and offspring birth size at elevated environmental pollutant exposures. *ENVIRONMENT INTERNATIONAL* 2017, 107, 205-215
- [11] Xia, X; Liang, CM; Sheng, J; Yan, SQ; Huang, K; Li, ZJ; Pan, WJ; Tao, RW; Hao, JH; Zhu, BB; Tong, SL; Tao, FB. Association between serum arsenic levels and gestational diabetes mellitus: A population-based birth cohort study. *ENVIRONMENTAL POLLUTION* 2018, 235, 850-856
- [12] Fatima, SS; Maqbool, MA; Syed, A; Alam, F. Low vitamin D and risk for small for gestation age babies in gestational diabetes. *INTERNATIONAL JOURNAL OF DIABETES IN DEVELOPING COUNTRIES*, 2018, 38, 36-41

[13] Noureldeen, AFH; Al-Ghamdi, MA; Al-Solami, YSZ. Maternal Status of Trace Elements in Normal Pregnancy and in Gestational Diabetes Mellitus. INTERNATIONAL JOURNAL OF PHARMACEUTICAL AND PHYTOPHARMACOLOGICAL RESEARCH, 2018, 8, 1-9

[14] Xing, YL; Xia, W; Zhang, B; Zhou, AF; Huang, Z; Zhang, HL; Liu, HX; Jiang, YQ; Hu, C; Chen, XM; Xu, SQ; Li, YY. Relation between cadmium exposure and gestational diabetes mellitus. ENVIRONMENT INTERNATIONAL 2018, 113, 300-305

[15] Liu, WY; Zhang, B; Huang, Z; Pan, XY; Chen, XM; Hu, C; Liu, HX; Jiang, YQ; Sun, XJ; Peng, Y; Xia, W; Xu, SQ; Li, YY. Cadmium Body Burden and Gestational Diabetes Mellitus: A Prospective Study. ENVIRONMENTAL HEALTH PERSPECTIVES 2018, 126, Article Number UNSP 027006
